# Supplementary material for: Indole-Based Compounds as Potential Drug Candidates for SARS-CoV-2
Source: MDPI journal article supplement (doi:10.3390/molecules28186603), 2023-09-13
Supplement: s1 [file s1]

## Supporting Information

### Indole-based compounds as potential drug candidates for SARS-CoV-2

Adel S. Girgis <sup>\*a</sup>, Siva S. Panda <sup>\*b</sup>, Benson M. Kariuki <sup>c</sup>, Mohamed S. Bekheit <sup>a</sup>, Reham F. Barghash <sup>a</sup>, Dalia R. Aboshouk <sup>a</sup>

<sup>a</sup> *Department of Pesticide Chemistry, National Research Centre, Dokki, Giza, 12622, Egypt*

<sup>b</sup> *Department of Chemistry and Biochemistry, Augusta University, Augusta, GA 30912, USA*

<sup>c</sup> *School of Chemistry, Cardiff University, Main Building, Park Place, Cardiff, CF10 3AT, UK*

\* Corresponding authors: [sspanda12@gmail.com](mailto:sspanda12@gmail.com) or [sipanda@augusta.edu](mailto:sipanda@augusta.edu) (S.S. Panda) and [as.girgis@nrc.sci.eg](mailto:as.girgis@nrc.sci.eg) or [girgisas10@yahoo.com](mailto:girgisas10@yahoo.com) (A.S. Girgis)

Table S1: List of potential Indole-based compounds and their activities (IC<sub>50</sub>/EC<sub>50</sub>) against SARS-CoV-2

| S.No. | Compound Name | Compound Structure                                                                  | IC <sub>50</sub> /EC <sub>50</sub> | Virus/Enzyme       |
|-------|---------------|-------------------------------------------------------------------------------------|------------------------------------|--------------------|
| 1     | Arbidol       | 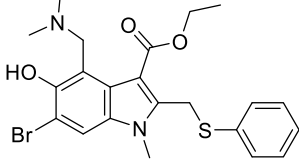  | IC <sub>50</sub> = 4.11 μM         | SARS-CoV-2         |
| 2     | Indomethacin  |  | EC <sub>50</sub> = 94.9 μM         | SARS-CoV 2/NL/2020 |

|   |                                      |                                                                                     |                                                          |                                              |
|---|--------------------------------------|-------------------------------------------------------------------------------------|----------------------------------------------------------|----------------------------------------------|
| 3 | <b>B1</b>                            | 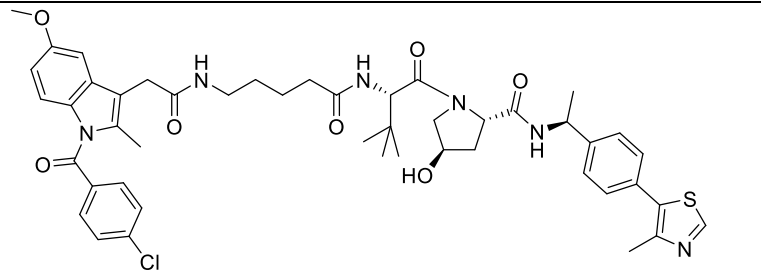  | EC <sub>50</sub> = >50 μM<br>EC <sub>50</sub> = >50 μM   | SARS-CoV 2/NL/2020<br>SARS-CoV-2/Padova/2021 |
| 4 | <b>B2</b>                            |   | EC <sub>50</sub> = 18.1 μM<br>EC <sub>50</sub> = 25.4 μM | SARS-CoV 2/NL/2020<br>SARS-CoV-2/Padova/2021 |
| 5 | <b>B3</b>                            |   | EC <sub>50</sub> = >50 μM<br>EC <sub>50</sub> = >50 μM   | SARS-CoV 2/NL/2020<br>SARS-CoV-2/Padova/2021 |
| 6 | <b>Lufotrelvir<br/>(PF-07304814)</b> |  | IC <sub>50</sub> = 0.692 μM                              | M <sup>pro</sup> SARSCoV-2                   |

|    |                                 |                                                                                     |                         |                              |
|----|---------------------------------|-------------------------------------------------------------------------------------|-------------------------|------------------------------|
| 7  | <b>PF-00835231</b>              | 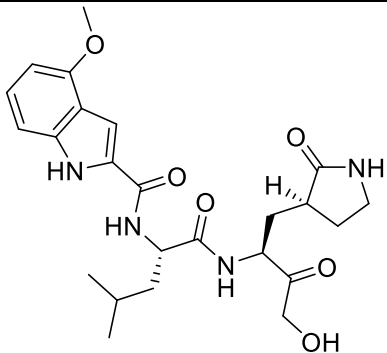   | $IC_{50} = 0.009 \mu M$ | M <sup>pro</sup> SARSCoV-2   |
| 8  | <b>Obatoclax<br/>(GX15-070)</b> |    | $EC_{50}: 23.2 \mu M$   | Nijmegen1                    |
| 9  | <b>Neoechinulin A</b>           |   | $IC_{50} = 0.47 \mu M$  | M <sup>pro</sup> -SARS-CoV-2 |
| 10 | <b>Echinulin</b>                |  | $IC_{50} = 3.90 \mu M$  | M <sup>pro</sup> -SARS-CoV-2 |

|    |                       |                                                                                    |                                |                              |
|----|-----------------------|------------------------------------------------------------------------------------|--------------------------------|------------------------------|
| 11 | <b>GC376</b>          | 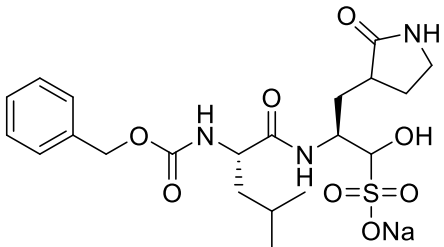 | $IC_{50} = 0.36 \mu M$         | M <sup>pro</sup> -SARS-CoV-2 |
| 12 | <b>Neoechinulin B</b> |   | $IC_{50} = 32.9 \mu M$         | Vero E6                      |
| 13 | <b>C9</b>             |   | $IC_{50} = 41.8 \pm 8.0 \mu M$ | M <sup>pro</sup> -SARS-CoV-2 |
| 14 | <b>C17</b>            |  | $IC_{50} = 15.5 \pm 1.2 \mu M$ | M <sup>pro</sup> -SARS-CoV-2 |

|    |            |                                                                                    |                                   |                              |
|----|------------|------------------------------------------------------------------------------------|-----------------------------------|------------------------------|
| 15 | <b>C23</b> | 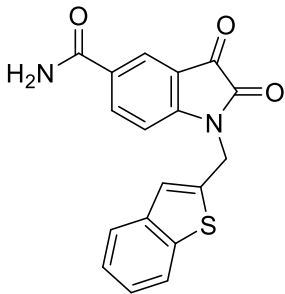  | $IC_{50} = 0.053 \pm 0.01 \mu M$  | M <sup>pro</sup> -SARS-CoV-2 |
| 16 | <b>C24</b> |   | $IC_{50} = 10.2 \pm 1.0 \mu M$    | M <sup>pro</sup> -SARS-CoV-2 |
| 17 | <b>C25</b> |   | $IC_{50} = 17.8 \pm 0.7 \mu M$    | M <sup>pro</sup> -SARS-CoV-2 |
| 18 | <b>C26</b> |  | $IC_{50} = 0.045 \pm 0.007 \mu M$ | M <sup>pro</sup> -SARS-CoV-2 |

|    |                   |                                                                                     |                                   |                 |
|----|-------------------|-------------------------------------------------------------------------------------|-----------------------------------|-----------------|
| 19 | <b>C27</b>        | 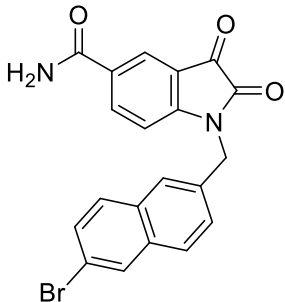   | $IC_{50} = 0.047 \pm 0.007 \mu M$ | SARS-CoV-2 RdRp |
| 20 | <b>C28</b>        |    | $IC_{50} = 24.9 \pm 4.6 \mu M$    | SARS-CoV-2 RdRp |
| 21 | <b>C29</b>        |   | $IC_{50} = 39.2 \pm 10.5 \mu M$   | SARS-CoV-2 RdRp |
| 22 | <b>Tideglusib</b> |  | $IC_{50} = 1.91 \pm 0.16 \mu M$   | SARS-CoV-2 RdRp |

|    |           |                                                                                      |                                  |                 |
|----|-----------|--------------------------------------------------------------------------------------|----------------------------------|-----------------|
| 23 | <b>D1</b> | 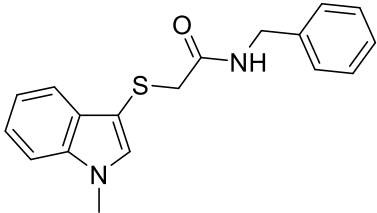   | $IC_{50} = 26.92 \pm 3.54 \mu M$ | SARS-CoV-2 RdRp |
| 24 | <b>D2</b> |    | $IC_{50} = 12.3 \pm 1.40 \mu M$  | SARS-CoV-2 RdRp |
| 25 | <b>D3</b> |    | Not active                       | SARS-CoV-2 RdRp |
| 26 | <b>D4</b> |   | $IC_{50} = 8.91 \pm 0.87 \mu M$  | SARS-CoV-2 RdRp |
| 27 | <b>D5</b> |  | $IC_{50} = 9.82 \pm 0.96 \mu M$  | SARS-CoV-2 RdRp |

|    |            |                                                                                      |                                 |                 |
|----|------------|--------------------------------------------------------------------------------------|---------------------------------|-----------------|
| 28 | <b>D6</b>  | 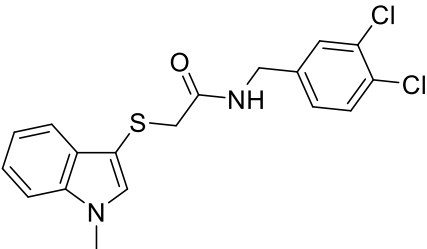    | $IC_{50} = 7.50 \pm 1.68 \mu M$ | SARS-CoV-2 RdRp |
| 29 | <b>D7</b>  |     | $IC_{50} = 6.81 \pm 1.03 \mu M$ | SARS-CoV-2 RdRp |
| 30 | <b>D8</b>  |     | $IC_{50} = 3.35 \pm 0.21 \mu M$ | SARS-CoV-2 RdRp |
| 31 | <b>D9</b>  |   | $IC_{50} = 7.94 \pm 1.02 \mu M$ | SARS-CoV-2 RdRp |
| 32 | <b>D10</b> |  | $IC_{50} = 9.08 \pm 1.38 \mu M$ | SARS-CoV-2 RdRp |



|    |            |                                                                                    |                                 |                 |
|----|------------|------------------------------------------------------------------------------------|---------------------------------|-----------------|
| 33 | <b>D11</b> | 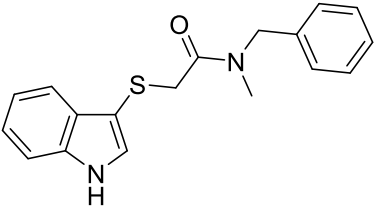  | $IC_{50} = 4.55 \pm 0.23 \mu M$ | SARS-CoV-2 RdRp |
| 34 | <b>D12</b> |   | $IC_{50} = 7.64 \pm 0.54 \mu M$ | SARS-CoV-2 RdRp |
| 35 | <b>D13</b> |   | $IC_{50} = 6.68 \pm 0.86 \mu M$ | SARS-CoV-2 RdRp |
| 36 | <b>D14</b> |  | $IC_{50} = 8.71 \pm 0.33 \mu M$ | SARS-CoV-2 RdRp |

|    |            |                                                                                     |                                  |                 |
|----|------------|-------------------------------------------------------------------------------------|----------------------------------|-----------------|
| 37 | <b>D25</b> | 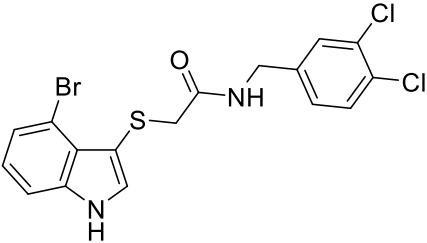   | $IC_{50} = 7.21 \pm 0.59 \mu M$  | SARS-CoV-2 RdRp |
| 38 | <b>D16</b> |    | $IC_{50} = 10.72 \pm 1.11 \mu M$ | SARS-CoV-2 RdRp |
| 39 | <b>D17</b> |   | $IC_{50} = 9.77 \pm 0.46 \mu M$  | SARS-CoV-2 RdRp |
| 40 | <b>D18</b> |  | $IC_{50} = 10.01 \pm 0.95 \mu M$ | SARS-CoV-2 RdRp |

|    |            |                                                                                    |                                 |                 |
|----|------------|------------------------------------------------------------------------------------|---------------------------------|-----------------|
| 41 | <b>D19</b> | 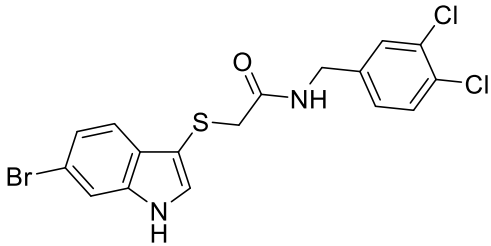 | $IC_{50} = 8.71 \pm 0.63 \mu M$ | SARS-CoV-2 RdRp |
| 42 | <b>D20</b> |   | $IC_{50} = 7.08 \pm 0.65 \mu M$ | SARS-CoV-2 RdRp |
| 43 | <b>D21</b> |  | $IC_{50} = 4.55 \pm 0.25 \mu M$ | SARS-CoV-2 RdRp |
| 44 | <b>D22</b> |  | $IC_{50} = 1.65 \pm 0.05 \mu M$ | SARS-CoV-2 RdRp |

|    |            |                                                                                     |                                  |                 |
|----|------------|-------------------------------------------------------------------------------------|----------------------------------|-----------------|
| 45 | <b>D23</b> | 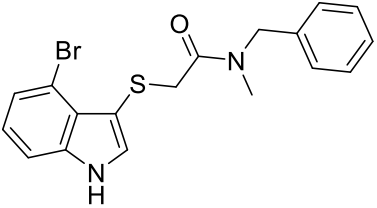   | $IC_{50} = 4.73 \pm 0.67 \mu M$  | SARS-CoV-2 RdRp |
| 46 | <b>D24</b> |    | $IC_{50} = 3.76 \pm 0.79 \mu M$  | SARS-CoV-2 RdRp |
| 47 | <b>D25</b> |    | $IC_{50} = 20.89 \pm 2.68 \mu M$ | SARS-CoV-2 RdRp |
| 48 | <b>D26</b> |   | $IC_{50} = 7.08 \pm 0.32 \mu M$  | SARS-CoV-2 RdRp |
| 49 | <b>D27</b> |  | $IC_{50} = 1.11 \pm 0.05 \mu M$  | SARS-CoV-2 RdRp |

|    |                   |                                                                                     |                                                           |                 |
|----|-------------------|-------------------------------------------------------------------------------------|-----------------------------------------------------------|-----------------|
| 50 | <b>Remdesivir</b> | 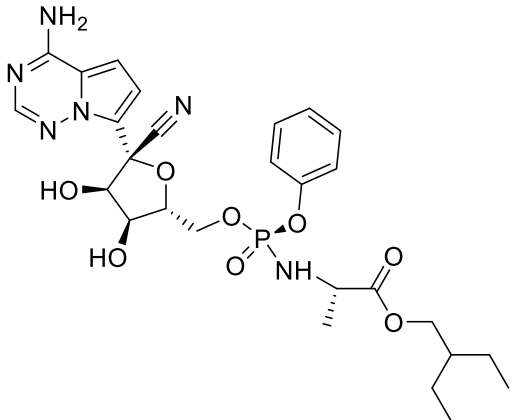  | $IC_{50} = 1.56 \pm 0.12 \mu M$<br>$EC_{50} = 1.05 \mu M$ | SARS-CoV-2 RdRp |
| 51 | <b>E1</b>         |    | $EC_{50} = 3.07 \mu M$                                    | SARS-CoV-2 RdRp |
| 52 | <b>E2</b>         |   | $EC_{50} = 2.75 \mu M$                                    | SARS-CoV-2 RdRp |
| 53 | <b>E3</b>         |  | $EC_{50} = 1.70 \mu M$                                    | SARS-CoV-2 RdRp |

|    |           |                                                                                     |                                                              |                                            |
|----|-----------|-------------------------------------------------------------------------------------|--------------------------------------------------------------|--------------------------------------------|
| 54 | <b>E4</b> | 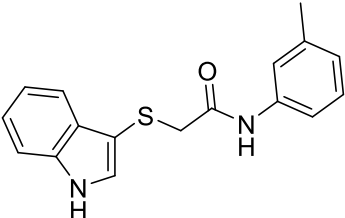   | $EC_{50} = 2.53 \mu\text{M}$                                 | SARS-CoV-2 RdRp                            |
| 55 | <b>E5</b> |    | $EC_{50} = 1.41 \mu\text{M}$                                 | SARS-CoV-2 RdRp                            |
| 56 | <b>F1</b> |    | $EC_{50} = 2.8 \mu\text{M}$<br>$IC_{50} = 0.25 \mu\text{M}$  | SARS-CoV-2<br>M <sup>pro</sup> -SARS-CoV-2 |
| 57 | <b>F2</b> |   | $EC_{50} = 15 \mu\text{M}$<br>$IC_{50} = 0.32 \mu\text{M}$   | SARS-CoV-2<br>M <sup>pro</sup> -SARS-CoV-2 |
| 58 | <b>F3</b> |  | $EC_{50} = 43.7 \mu\text{M}$<br>$IC_{50} = 0.31 \mu\text{M}$ | SARS-CoV-2<br>M <sup>pro</sup> -SARS-CoV-2 |

|    |           |                                                                                     |                                                              |                                            |
|----|-----------|-------------------------------------------------------------------------------------|--------------------------------------------------------------|--------------------------------------------|
| 59 | <b>F4</b> | 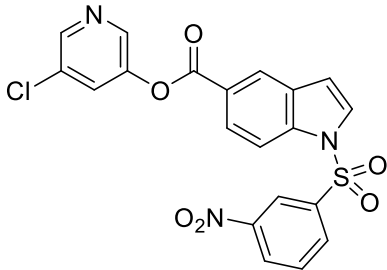   | $EC_{50} = 69.8 \mu\text{M}$<br>$IC_{50} = 0.12 \mu\text{M}$ | SARS-CoV-2<br>M <sup>pro</sup> -SARS-CoV-2 |
| 60 | <b>F5</b> |    | $EC_{50} = 8.1 \mu\text{M}$<br>$IC_{50} = 0.90 \mu\text{M}$  | SARS-CoV-2<br>M <sup>pro</sup> -SARS-CoV-2 |
| 61 | <b>F6</b> |    | $EC_{50} = 15 \mu\text{M}$<br>$IC_{50} = 0.073 \mu\text{M}$  | SARS-CoV-2<br>M <sup>pro</sup> -SARS-CoV-2 |
| 62 | <b>F7</b> |   | $EC_{50} = 11.5 \mu\text{M}$<br>$IC_{50} = 0.38 \mu\text{M}$ | SARS-CoV-2<br>M <sup>pro</sup> -SARS-CoV-2 |
| 63 | <b>F8</b> |  | $EC_{50} = 56 \mu\text{M}$<br>$IC_{50} = 0.47 \mu\text{M}$   | SARS-CoV-2<br>M <sup>pro</sup> -SARS-CoV-2 |

|    |            |                                                                                     |                                                          |                                            |
|----|------------|-------------------------------------------------------------------------------------|----------------------------------------------------------|--------------------------------------------|
| 64 | <b>F9</b>  | 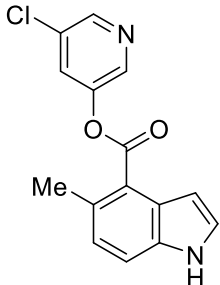   | EC <sub>50</sub> = >100 μM<br>IC <sub>50</sub> = 10.3 μM | SARS-CoV-2<br>M <sup>pro</sup> -SARS-CoV-2 |
| 65 | <b>F10</b> |    | EC <sub>50</sub> = 3.1 μM<br>IC <sub>50</sub> = 0.59 μM  | SARS-CoV-2<br>M <sup>pro</sup> -SARS-CoV-2 |
| 66 | <b>F11</b> |    | EC <sub>50</sub> = 14 μM<br>IC <sub>50</sub> = 0.87 μM   | SARS-CoV-2<br>M <sup>pro</sup> -SARS-CoV-2 |
| 67 | <b>F12</b> |   | EC <sub>50</sub> = >100 μM<br>IC <sub>50</sub> = 100 μM  | SARS-CoV-2<br>M <sup>pro</sup> -SARS-CoV-2 |
| 68 | <b>F13</b> |  | EC <sub>50</sub> = >100 μM<br>IC <sub>50</sub> = >100 μM | SARS-CoV-2<br>M <sup>pro</sup> -SARS-CoV-2 |



|    |                           |                                                                                     |                                                          |                                            |
|----|---------------------------|-------------------------------------------------------------------------------------|----------------------------------------------------------|--------------------------------------------|
| 69 | <b>F14</b>                | 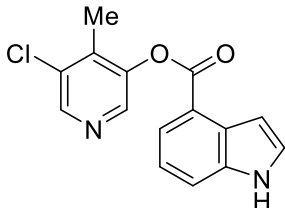   | EC <sub>50</sub> = 19.3 μM<br>IC <sub>50</sub> = 2.2 μM  | SARS-CoV-2<br>M <sup>pro</sup> -SARS-CoV-2 |
| 70 | <b>F15</b>                |    | EC <sub>50</sub> = 30 μM<br>IC <sub>50</sub> = 15.3 μM   | SARS-CoV-2<br>M <sup>pro</sup> -SARS-CoV-2 |
| 71 | <b>16</b>                 |   | EC <sub>50</sub> = 30.2 μM<br>IC <sub>50</sub> = 5.32 μM | SARS-CoV-2<br>M <sup>pro</sup> -SARS-CoV-2 |
| 72 | <b>Hydroxychloroquine</b> |   | IC <sub>50</sub> = 29.25 μM                              | Vero E6                                    |
| 73 | <b>Chloroquine</b>        |  | IC <sub>50</sub> = 19.78 μM                              | Vero E6                                    |
| 74 | <b>Favipiravir</b>        |  | IC <sub>50</sub> = 1382 μM                               | Vero E6                                    |

|    |           |                                                                                    |                         |         |
|----|-----------|------------------------------------------------------------------------------------|-------------------------|---------|
| 75 | <b>G1</b> | 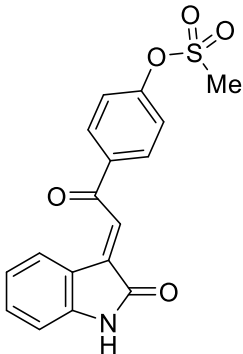  | $IC_{50} = 3.799 \mu M$ | Vero E6 |
| 76 | <b>G2</b> |   | $IC_{50} = 55.14 \mu M$ | Vero E6 |
| 77 | <b>G3</b> |  | $IC_{50} = 13.52 \mu M$ | Vero E6 |

|    |           |                                                                                    |                         |         |
|----|-----------|------------------------------------------------------------------------------------|-------------------------|---------|
| 78 | <b>H1</b> | 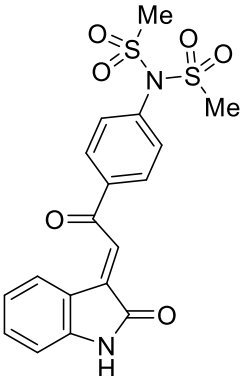  | $IC_{50} = 219 \mu M$   | Vero E6 |
| 79 | <b>H2</b> |   | $IC_{50} = 3.417 \mu M$ | Vero E6 |
| 80 | <b>H3</b> |  | $IC_{50} = 20.1 \mu M$  | Vero E6 |

|    |           |                                                                                    |                         |         |
|----|-----------|------------------------------------------------------------------------------------|-------------------------|---------|
| 81 | <b>I1</b> | 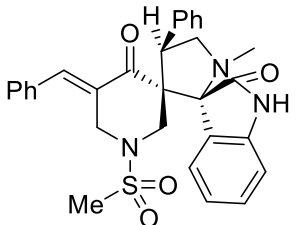  | $IC_{50} = 34.26 \mu M$ | Vero E6 |
| 82 | <b>I2</b> |   | $IC_{50} = 9.628 \mu M$ | Vero E6 |
| 83 | <b>I3</b> |   | $IC_{50} = 102.6 \mu M$ | Vero E6 |
| 84 | <b>I4</b> |  | $IC_{50} = 171.3 \mu M$ | Vero E6 |

|    |           |                                                                                    |                         |         |
|----|-----------|------------------------------------------------------------------------------------|-------------------------|---------|
| 85 | <b>I5</b> | 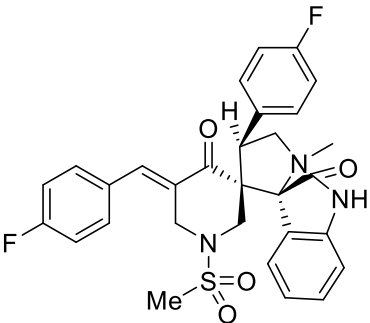  | $IC_{50} = 27.85 \mu M$ | Vero E6 |
| 86 | <b>I6</b> |   | $IC_{50} = 7.666 \mu M$ | Vero E6 |
| 87 | <b>I7</b> |  | $IC_{50} = 16.91 \mu M$ | Vero E6 |

|    |            |                                                                                     |                         |         |
|----|------------|-------------------------------------------------------------------------------------|-------------------------|---------|
| 88 | <b>I8</b>  | 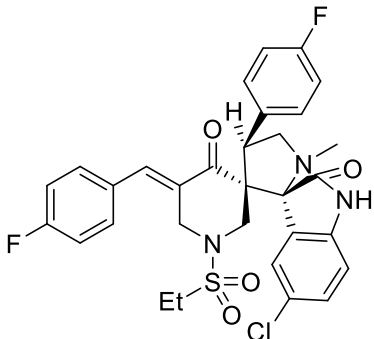   | $IC_{50} = 7.689 \mu M$ | Vero E6 |
| 89 | <b>I9</b>  |    | $IC_{50} = 113.3 \mu M$ | Vero E6 |
| 90 | <b>I10</b> |  | $IC_{50} = 27.09 \mu M$ | Vero E6 |

|    |            |                                                                                    |                         |         |
|----|------------|------------------------------------------------------------------------------------|-------------------------|---------|
| 91 | <b>I11</b> | 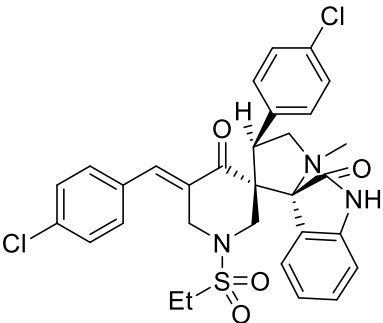  | $IC_{50} = 55.45 \mu M$ | Vero E6 |
| 92 | <b>I12</b> |   | $IC_{50} = 31.45 \mu M$ | Vero E6 |
| 93 | <b>I13</b> |  | $IC_{50} = 8.924 \mu M$ | Vero E6 |

|    |            |                                                                                    |                                                             |                                            |
|----|------------|------------------------------------------------------------------------------------|-------------------------------------------------------------|--------------------------------------------|
| 94 | <b>I14</b> | 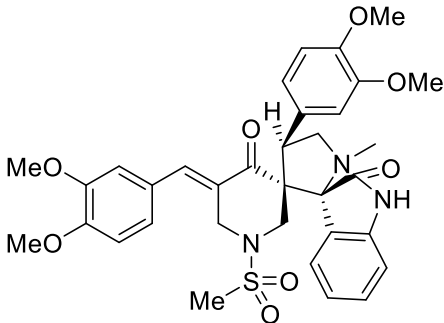 | $IC_{50} = 35.89 \mu M$                                     | Vero E6                                    |
| 95 | <b>I15</b> |  | $IC_{50} = 88.25 \mu M$                                     | Vero E6                                    |
| 96 | <b>J1</b>  |  | $IC_{50} = 10.39 \mu M$<br>$IC_{50} = 9.605 \pm 0.66 \mu M$ | SARS-CoV-2<br>M <sup>pro</sup> -SARS-CoV-2 |



|    |           |                                                                                    |                                                                    |                                                               |
|----|-----------|------------------------------------------------------------------------------------|--------------------------------------------------------------------|---------------------------------------------------------------|
| 97 | <b>J2</b> | 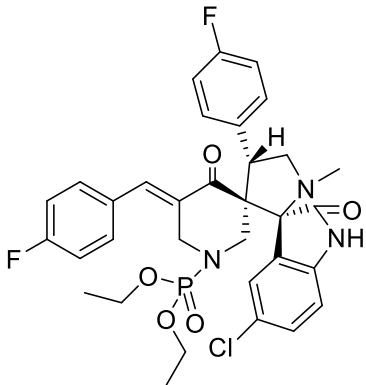  | $IC_{50} = 13.53 \mu M$<br>$IC_{50} = 42.82 \pm 2.53 \mu M$        | SARS-CoV-2<br>M <sup>pro</sup> -SARS-CoV-2                    |
| 98 | <b>J3</b> |   | $IC_{50} = 8.88 \mu M$<br>$IC_{50} = 15.59 \pm 1.02 \mu M$         | SARS-CoV-2<br>M <sup>pro</sup> -SARS-CoV-2                    |
| 99 | <b>22</b> |  | $IC_{50} = 1.72 \pm 0.75 \mu M$<br>$IC_{50} = 0.67 \pm 0.59 \mu M$ | M <sup>pro</sup> -SARS-CoV-2<br>PL <sup>pro</sup> -SARS-CoV-2 |
